# Supplementary material for: Childhood acute myeloid leukemia with 5q deletion and HNRNPH1-MLLT10 fusion: the first case report
Source: PubMed Central journal article supplement — Blood Adv. 2022 May 23;6(10):3162–6. doi: 10.1182/bloodadvances.2021006383 (PMC9131903; doi:10.1182/bloodadvances.2021006383), 2022-05-23
Supplement: advancesADV2021006383-suppl2.pdf [file advancesADV2021006383-suppl2.pdf]

# Supplemental Figure 1

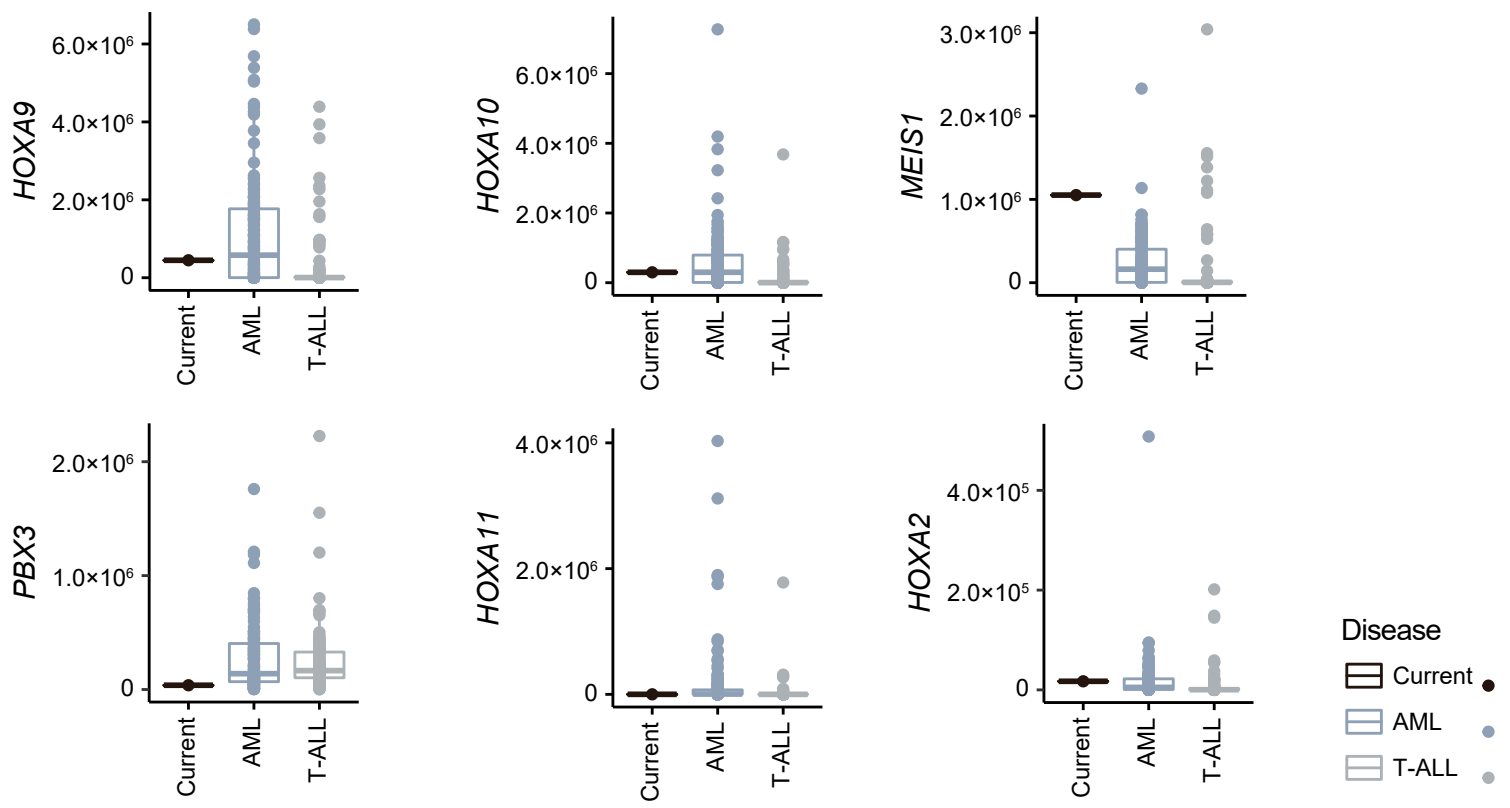

**Supplemental Figure S1. *HOXA9*-related gene expression level in the current sample.** The representative expression levels of the *HOXA9* group of genes, including *HOXA2*, *HOXA9*, *HOXA10*, *HOXA11*, *MEIS1* and *PBX3*, in the current sample are shown.

## Supplemental Figure 2

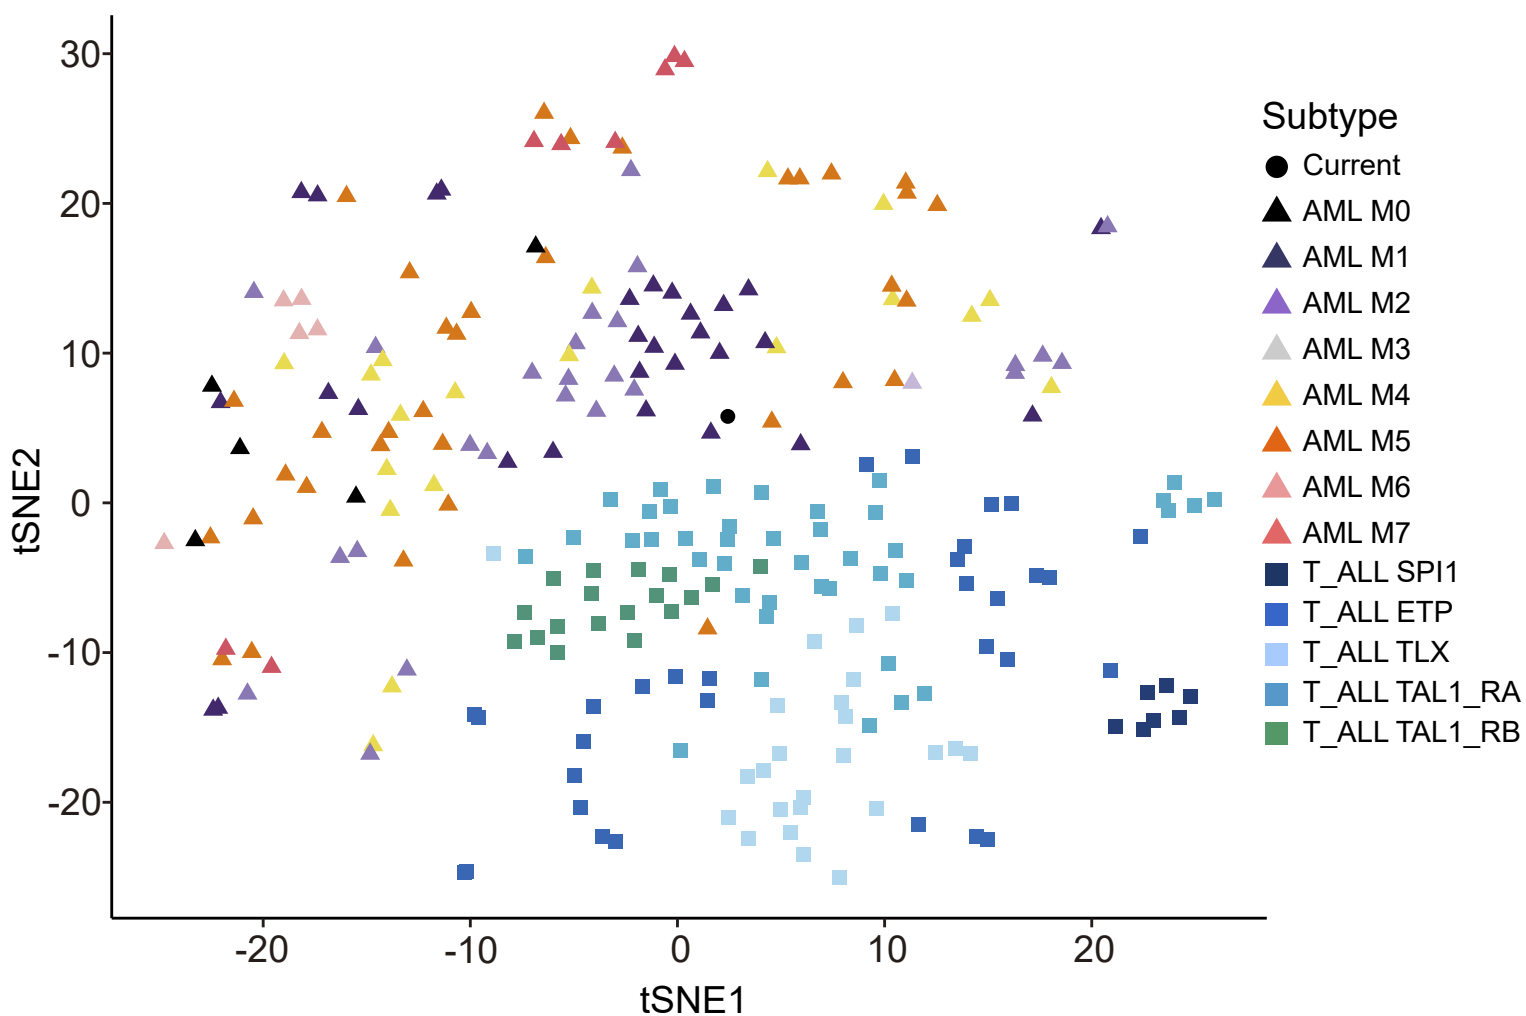

### Supplemental Figure S2. Visualization using t-Distributed Stochastic Neighbor Embedding.

Visualization using t-Distributed Stochastic Neighbor Embedding showed that the current sample was classified into AML group, not in T-ALL, and AML FAB M0 samples indicated heterogeneous gene expression profile signatures.

## Supplemental Figure S3

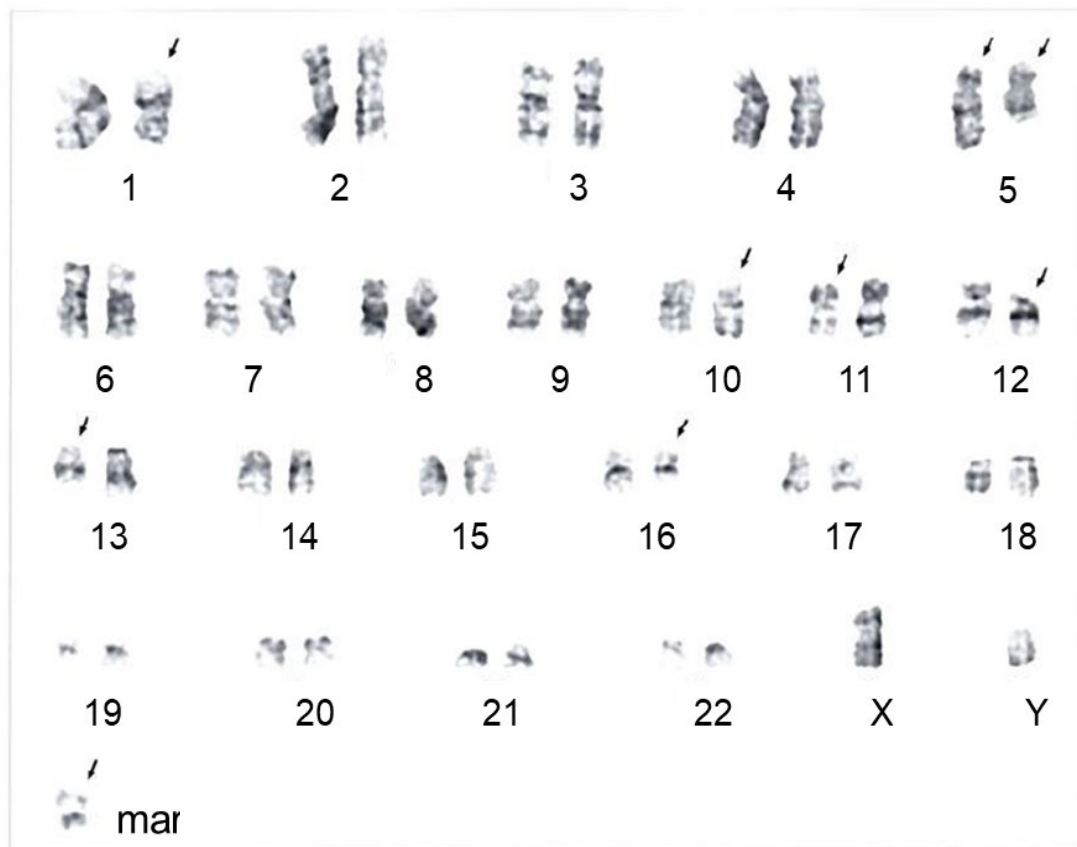

**Supplemental Figure S3. G-banded karyotype of AML of the patient.**
